# Supplementary material for: Glucotoxicity induces abnormal glucagon secretion through impaired insulin signaling in InR1G cells
Source: PubMed Central journal article supplement (PMC5398759; doi:10.1371/journal.pone.0176271), 2017-04-20
Supplement: pone.0176271.s001.pdf [file pone.0176271.s001.pdf]

**A**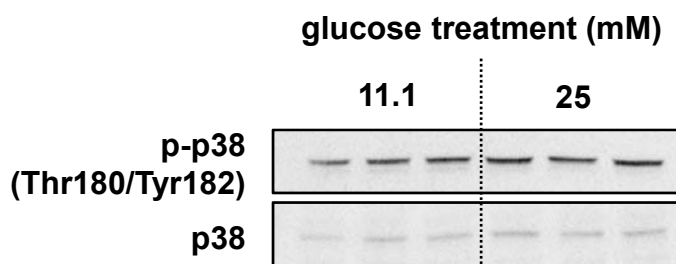**B**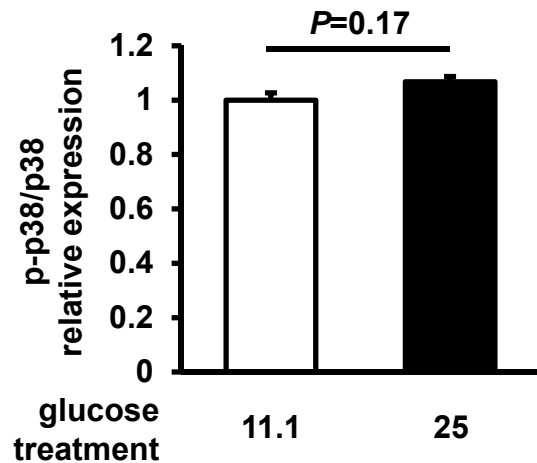

**S1 Figure. Phosphorylation status of p38.** InR1G cells were exposed to regular (11.1 mM, white) or high (25 mM, black) glucose levels for 12 h. (A) Phospho-(p)p38 and p38 levels. (B) Relative expression of p-p38 was determined using densitometry and normalized using total p38 levels.  $n=3$  in each group. Data are expressed as mean  $\pm$  SEM.
