# Supplementary material for: Glucotoxicity induces abnormal glucagon secretion through impaired insulin signaling in InR1G cells
Source: PubMed Central journal article supplement (PMC5398759; doi:10.1371/journal.pone.0176271), 2017-04-20
Supplement: pone.0176271.s002.pdf [file pone.0176271.s002.pdf]

**A**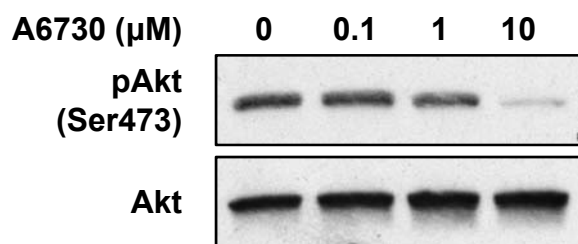**B**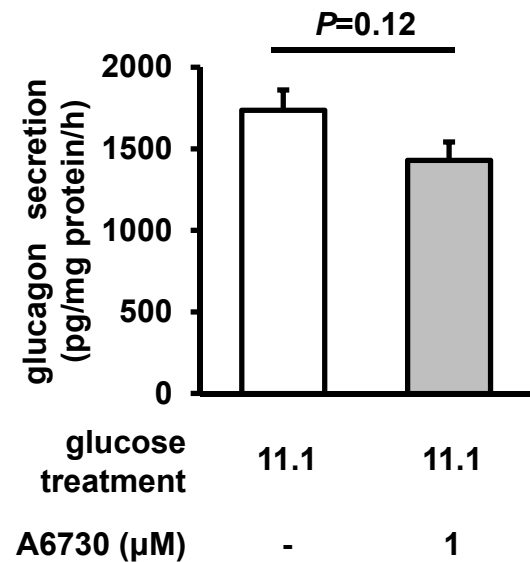

**S2 Figure. Effects of Akt inhibition on InR1G glucagon secretion.** Cells were cultured with A6730 (Sigma-Aldrich, U.S.A.) in indicated concentrations for 12 h. **(A)** Akt and pAkt levels. **(B)** Glucagon secretion in cells treated without (white) or with 1 μM A6730 (gray) for 12 h before the static incubation with 25 mM glucose.  $n=3-4$  in each group; data are expressed as mean  $\pm$  SEM.
